# Supplementary material
Source: publisher figshare collection journal article supplement (https://tandf.figshare.com/ndownloader/files/13347650)
Supplement: Supplementary file 1 [file 13347650]

# SUPPLEMENTAL DATA

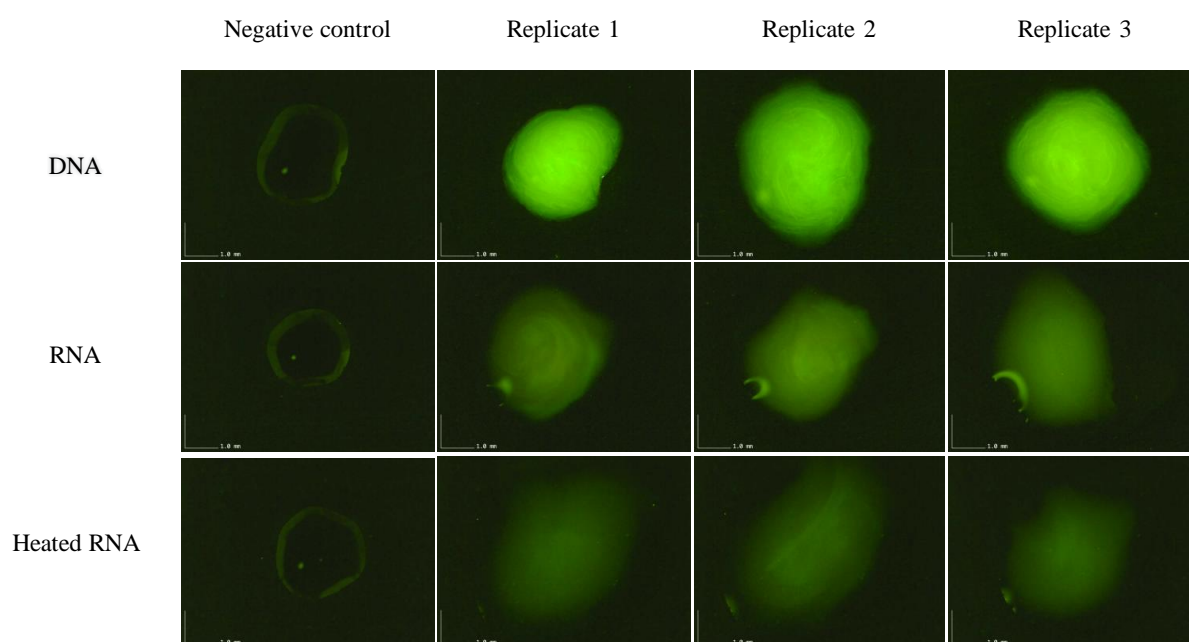

**Figure S1.** illustrating the DD staining within 10 ng DNA, RNA and heated RNA (40°C for 10 minutes) in three replicates. The fluorescent signal was visualised under the fluorescent microscope at 50 x magnification in ambient light.
